# Supplementary material for: Cobalt and nitrogen co-doped hierarchically porous carbon nanostructure: a bifunctional electrocatalyst for oxygen reduction and evolution reactions
Source: Royal Society of Chemistry journal article supplement (doi:10.1039/c8ta08476a), 2018-01-01
Supplement: c8ta08476a1.pdf [file c8ta08476a1.pdf]

*Electronic Supporting Information (ESI)*

**Cobalt and nitrogen co-doped hierarchically porous carbon nanosheet as  
bifunctional electrocatalys for oxygen reduction and evolution reactions**

Jakkid Sanetuntikul<sup>a,b</sup>, Suyeon Hyun<sup>a</sup>, Pandian Ganesan<sup>a</sup>, and Sangaraju Shanmugam <sup>a\*</sup>

<sup>a</sup> Department of Energy Science & Engineering, Daegu Gyeongbuk Institute of Science & Technology  
(DGIST), Daegu, Republic of Korea, 42988

<sup>b</sup> Faculty of Engineering and Technology, King Mongkut's University of Technology North Bangkok  
(KMUTNB), Bankhai, Rayong, Thailand, 21120

E-mail: [sangarajus@dgist.ac.kr](mailto:sangarajus@dgist.ac.kr)

## Experimental

### Physical characterization analysis:

The microstructures of samples were determined by field-emission transmission electron microscope (FE-TEM, Hitachi, HF-3300) with an acceleration voltage of 300 kV. For TEM analysis, samples were ultrasonically dispersed in isopropyl alcohol (IPA), and then a drop of dispersion was deposited on copper grid and dry under UV lamp. The crystal structure of samples was investigated by powder X-ray diffraction (XRD, Panalytical-Empyrean) using Cu K $\alpha$  radiation at a generator voltage of 40 kV and a tube current of 30 mA. The N<sub>2</sub> adsorption-desorption measurements were carried out using 'Micromeritics' (ASAP 2020) at 77 K. Bruner-Emmett-Teller (BET), Barrett-Joyner-Halenda (BJH) models were used to determine the specific surface area, the mesoporous (2-50 nm) pore size distributions information for the CoAAC samples. Before the measurements, the samples were degassed at 200 °C under vacuum for 4 hours. Crystal structure and elemental analysis studies performed by X-ray photoelectron spectroscopy (XPS, Thermo Fisher Scientific, ESCALAB250 XPS system, Theta Probe XPS system) using monochromated Al K-alpha source at 15 kV and 150 W. Binding energy values at X-axis were calibrated using C1s from a carbon value taken as 284.6 eV.

### Electrochemical characterization analysis:

The slopes of ORR for RDE based on Koutecky-Levich plots were determined by follow equation.

$$\frac{1}{J} = \frac{1}{J_L} + \frac{1}{J_K} = \frac{1}{B\omega^{\frac{1}{2}}} + \frac{1}{J_K}$$

$$B = 0.62 n F C_0 D_0^{\frac{2}{3}} v^{-\frac{1}{6}}$$

Where,  $J$  is the experimentally measured current,  $J_L$  is the diffusion-limiting current,  $J_k$  is the kinetic current,  $\omega$  is the angular velocity,  $F$  is the Faraday constant,  $C_0$  is the saturated concentration of  $O_2$  in 0.1 M KOH ( $1.2 \times 10^{-6} \text{ mol cm}^{-3}$ ),  $D_0$  is the diffusion coefficient of  $O_2$  in 0.1 M KOH ( $1.9 \times 10^{-5} \text{ cm}^2 \text{ s}^{-1}$ ), and  $\nu$  is the kinematic viscosity of the electrolyte. “ $n$ ” can calculate from slop by under plot of  $J^{-1}$  vs  $\omega^{-1/2}$  and  $J_k$  is calculated from inverse of intercept.

For RRDE, the formation of  $HO_2^-$  and the electron transfer number were determined by follow equation;

$$OH_2^- (\%) = 200 \times \frac{I_R / N}{I_D + (I_R / N)}$$

$$n = 4 \times \frac{I_D}{I_D + (I_R / N)}$$

Where,  $I_D$  is the disk current,  $I_R$  is the ring current, and  $N$  is the ring correction coefficient in RRDE experiment was determine to be 0.37 from the reduction of  $Fe(CN)_6^{4-/3-}$  redox couple. The ring potential was keep at 1.3 V vs. RHE.

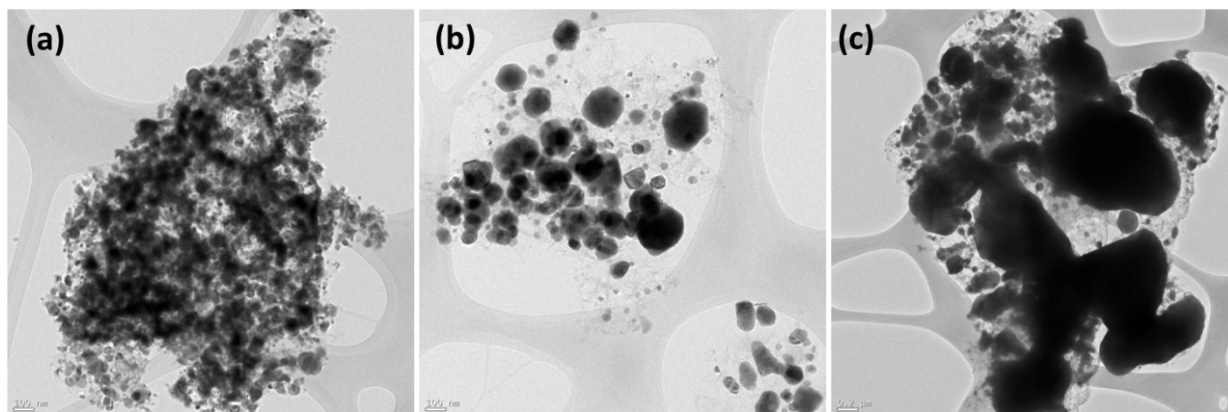

**Fig. S1** TEM images of pyrolyzed products obtained at (a) 700°C, (b) 800°C and (c) 900°C.

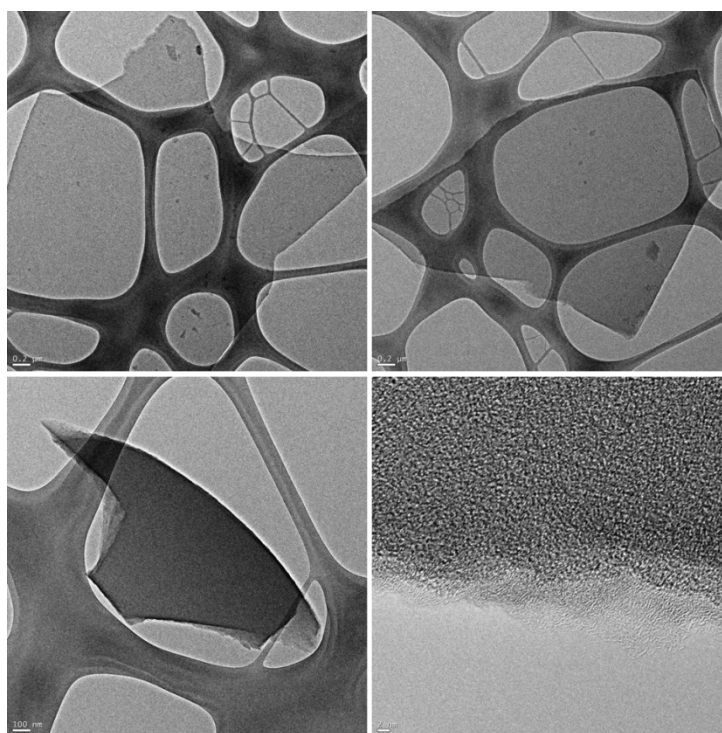

**Fig. S2** TEM images of NPC-71 catalyst without using cobalt in the precursor.

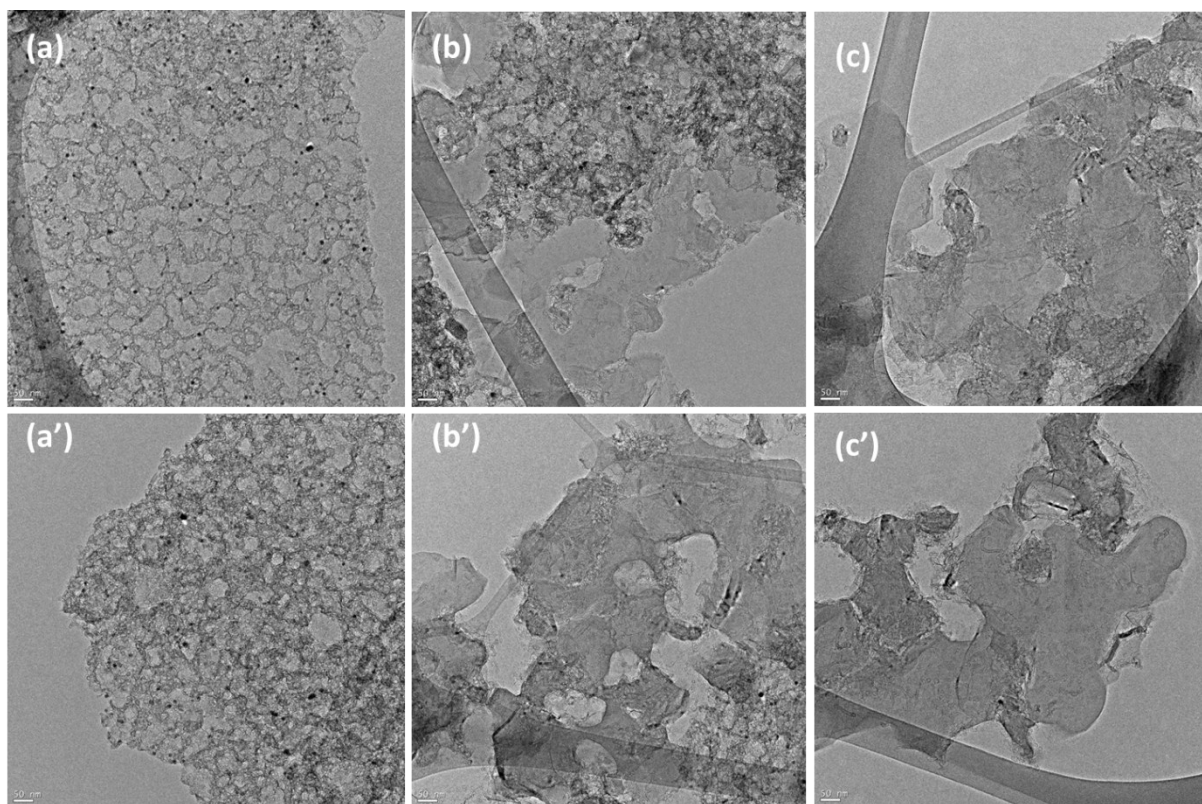

**Fig. S3** TEM images of (a, a') CoNPC-71, (b, b') CoNPC-81 and (c, c') CoNPC-91 catalyst.

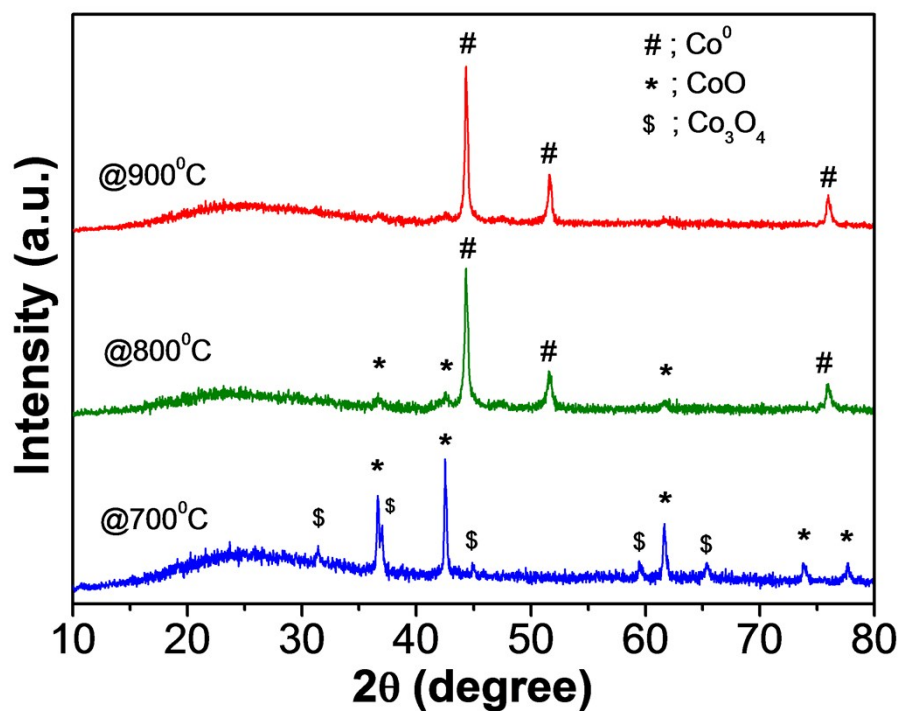

Fig. S4 XRD patterns of as-synthesized products (before acid treatment).

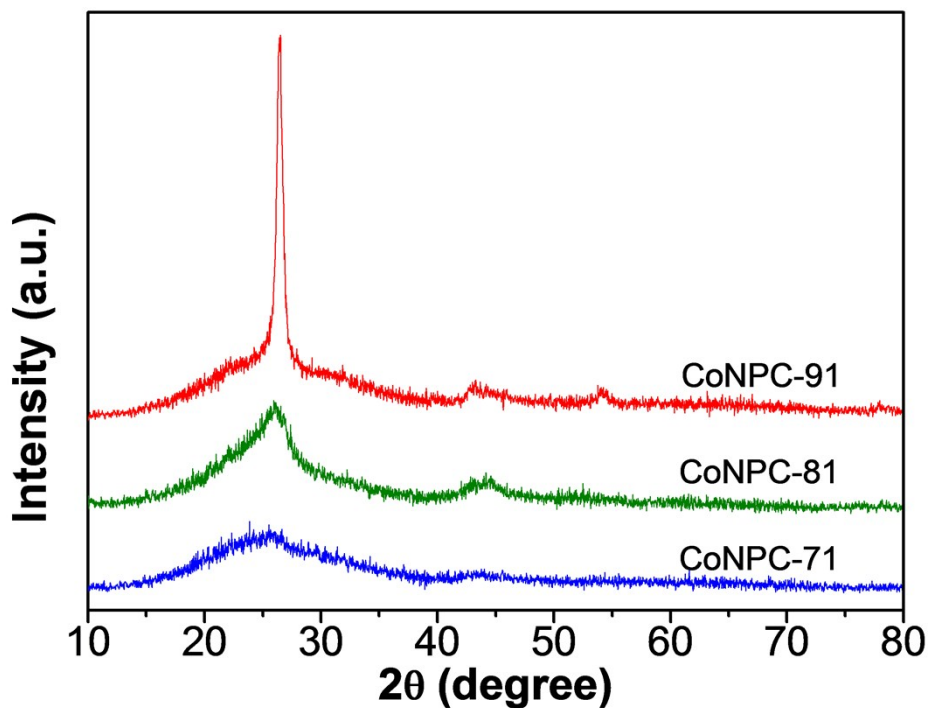

Fig. S5 XRD patterns of CoNPCs catalysts.

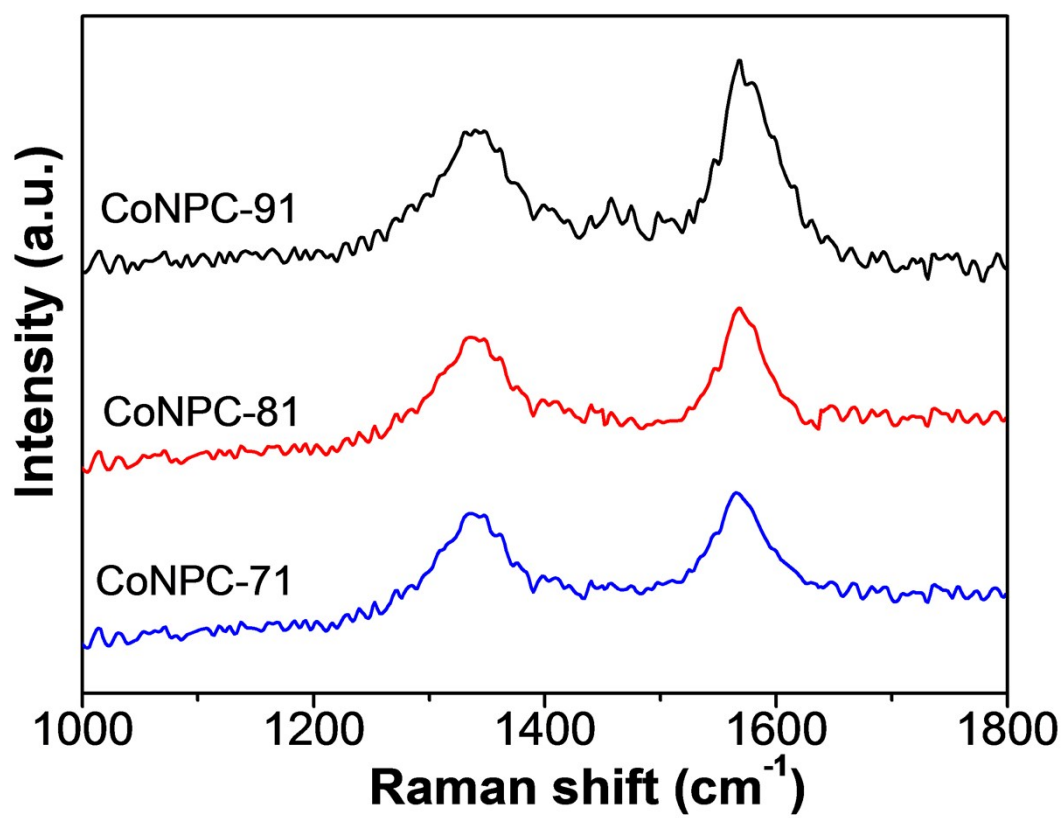

**Fig. S6** Raman spectra of CoNPCs catalysts.

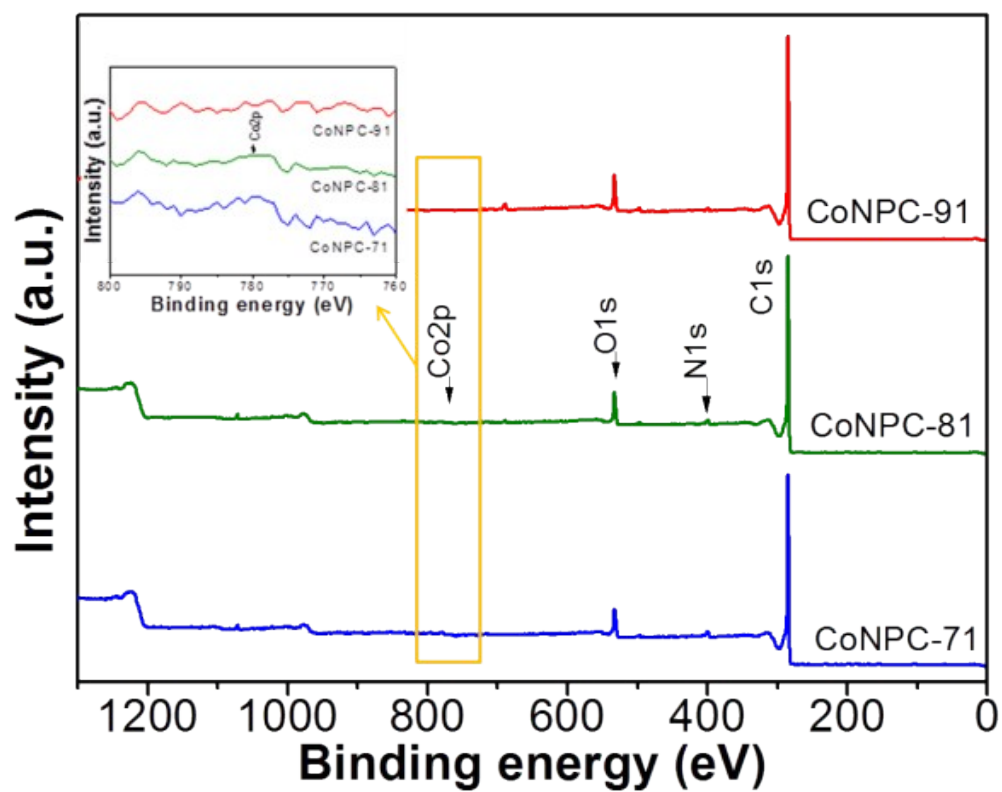

**Fig. S7** XPS survey spectra of CoNPCs catalysts. Inset shows a partial high-resolution magnified view of Co2p.



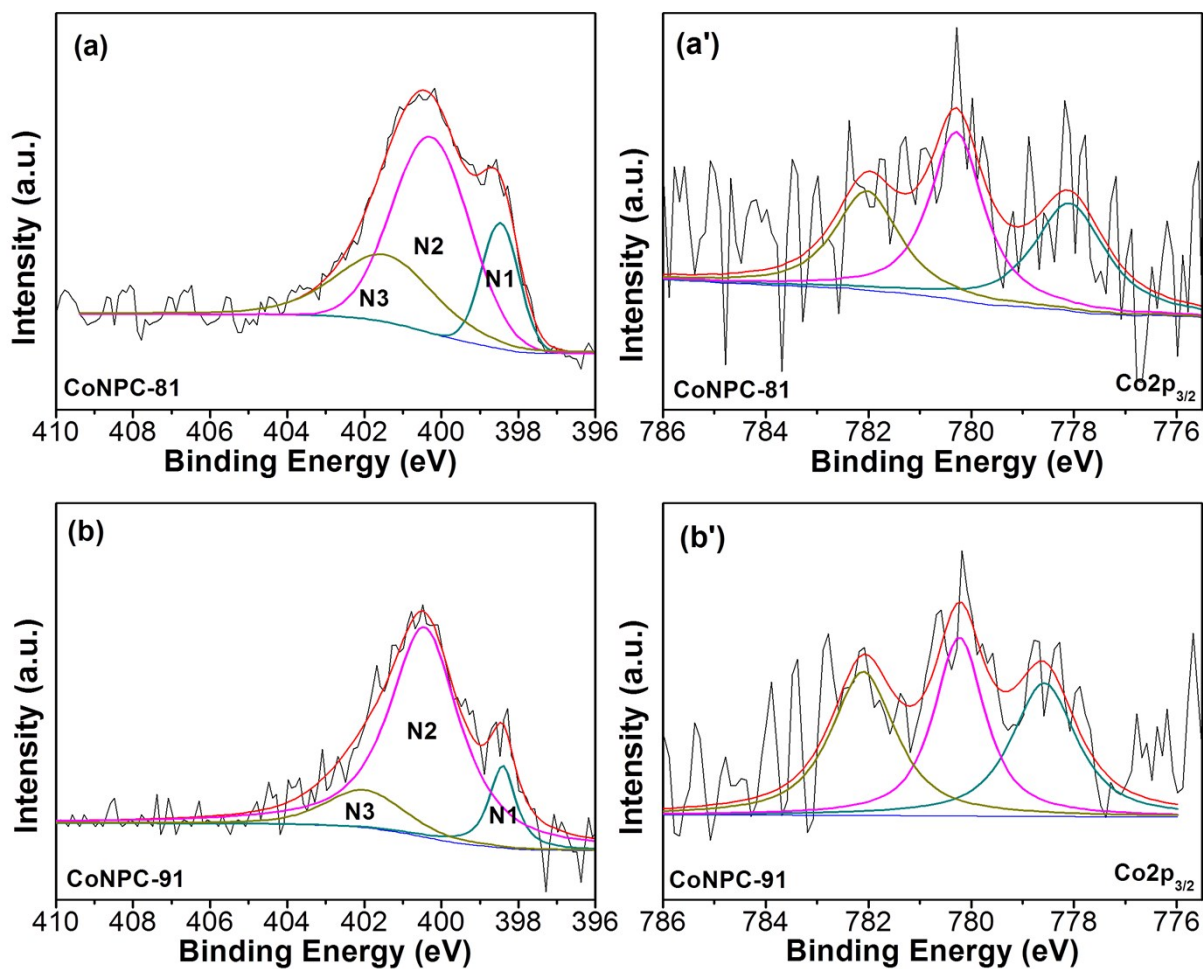

**Fig. S8** High resolution XPS of N1s spectra for (a) CoNPC-81 (b) CoNPC-91 and Co2p<sub>3/2</sub> spectra of (a') CoNPC-81 (b') CoNPC-91 catalyst.

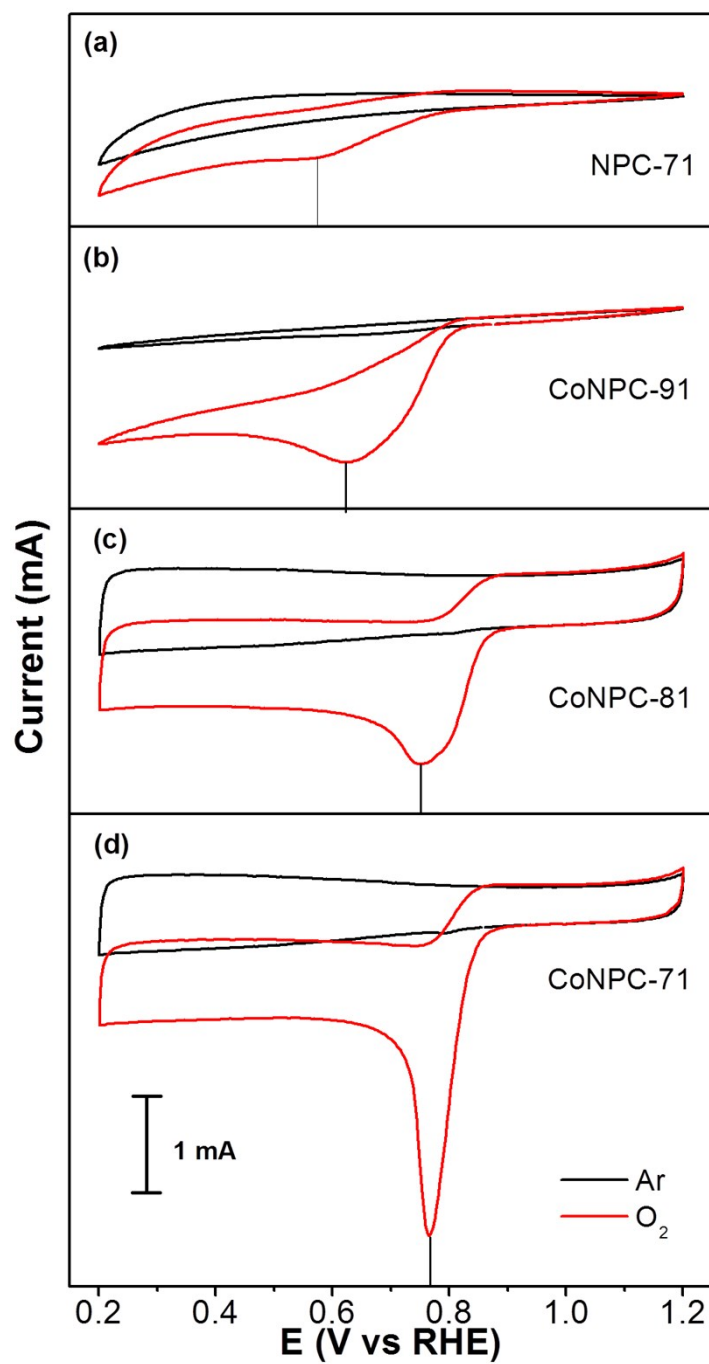

**Fig. S9** CVs curves of (a) NPC-71, (b) CoNPC-91, (c) CoNPC-81 and (d) CoNPC-71 on glassy carbon electrode in Ar and O<sub>2</sub>-saturated 0.1M KOH; peak position are shown as vertical line (solid black line).

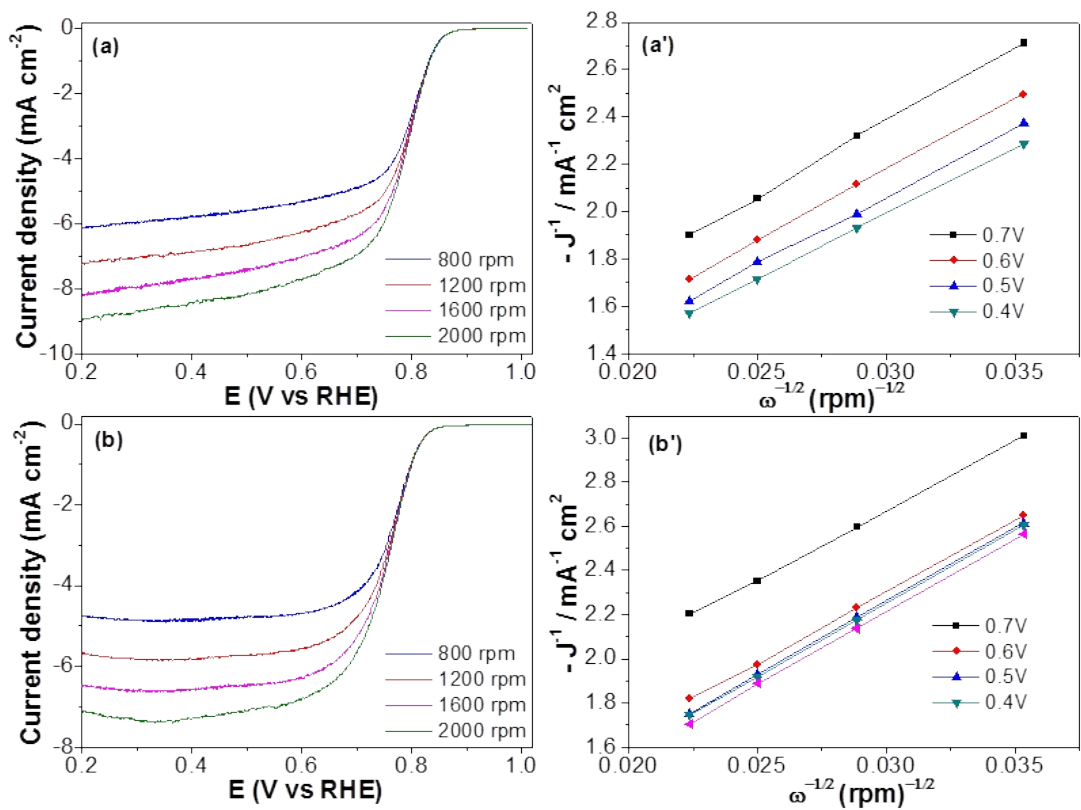

**Fig. S10** ORR polarization curve and K-L plot of (a, a') CoNPC-81 and (b, b') CoNPC-91, respectively.

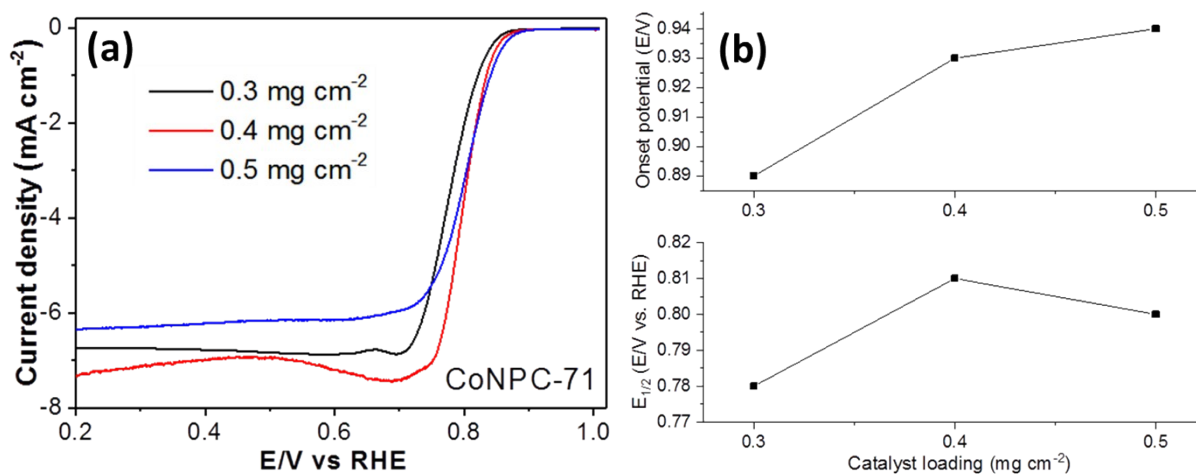

**Fig. S11** (a) ORR Polarization curves of CoNPC-71 catalyst with respect to the various catalyst loading from the range of 0.3 to 0.5 mg cm<sup>-2</sup> obtained from RDE measurement in O<sub>2</sub>-saturated 0.1M KOH at a sweep rate 10mVs<sup>-1</sup>, 1600 rpm, (b) trends in ORR activity, particularly onset potential and half-wave potential (E<sub>1/2</sub>) as a function of mass loading of CoNPC-71 catalyst.

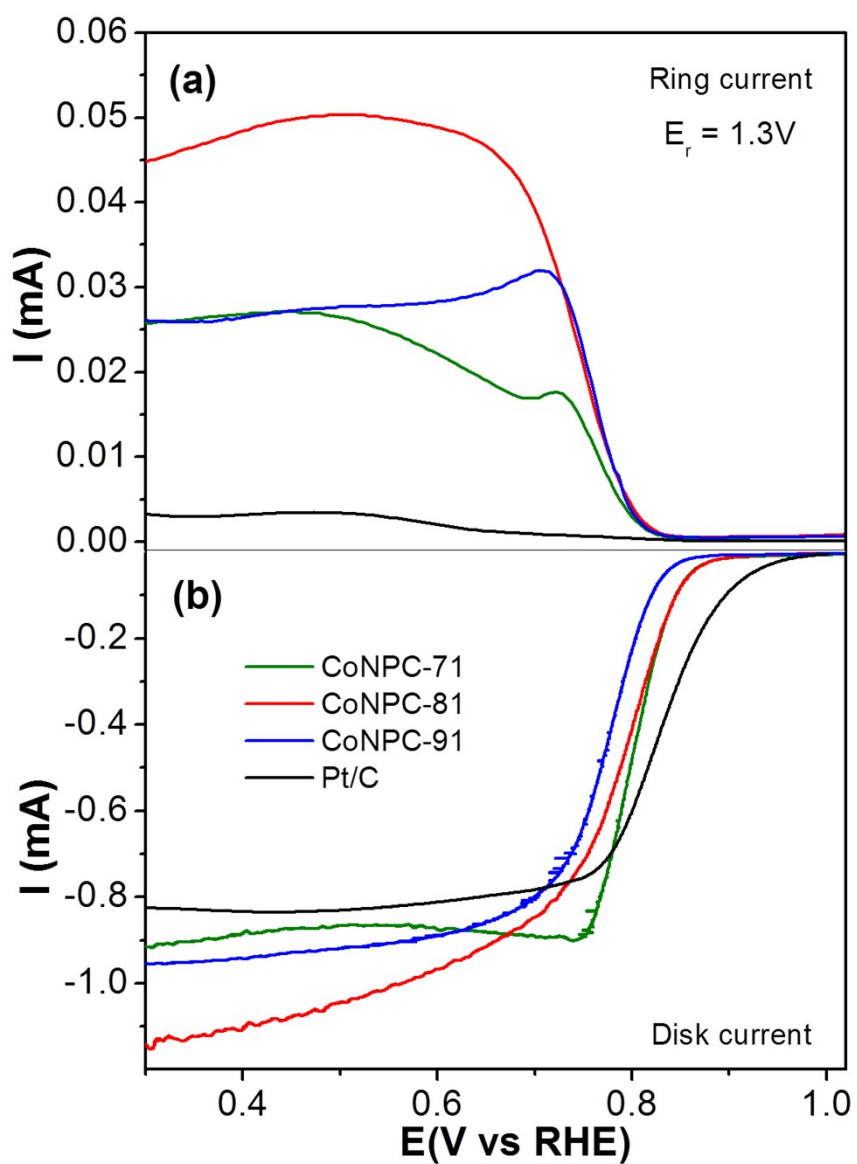

**Fig. S12** RRDE response of CoNPC-71, CoNPC-81, CoNPC-91 and Pt/C catalysts obtained at 1600 rpm in  $O_2$ -saturated 0.1 M KOH. (Catalyst loading:  $0.4 \text{ mg cm}^{-2}$  and Pt/C:  $30 \text{ } \mu\text{g cm}^{-2}$ ).

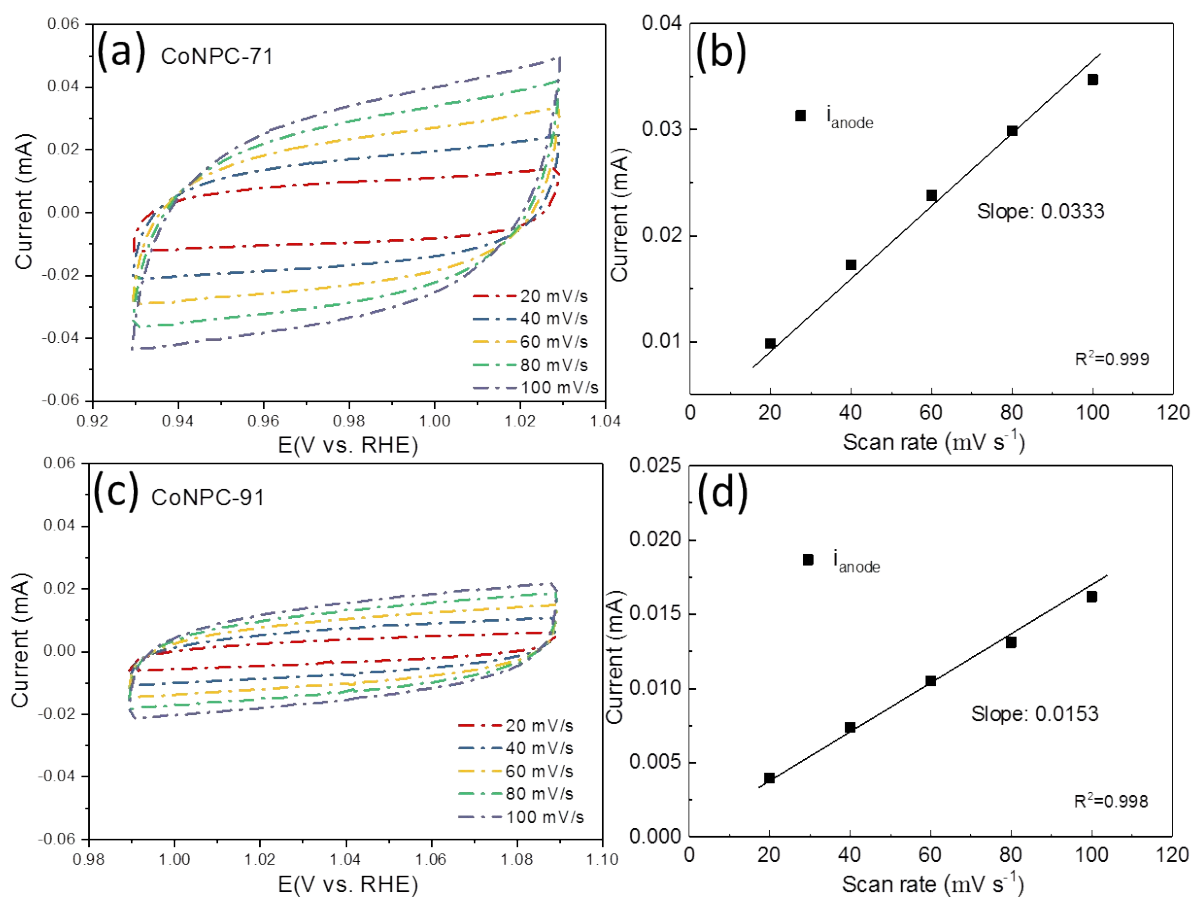

**Fig. S13** Electrochemical surface area (ESCA) from the correlation between the current and different scan rates from 20 to 100 mVs<sup>-1</sup> via CVs: (a,b) CoNPC-71 and (c,d) CoNPC-91 electrocatalysts.

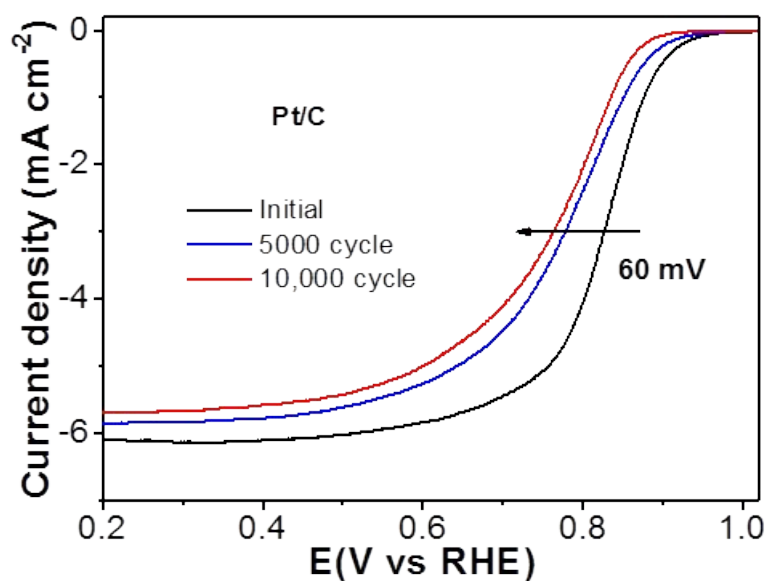

**Fig. S14** LSVs of Pt/C during cycling durability test (Cycling test was performed in range of 0.6-1.0 V vs RHE with  $50 \text{ mVs}^{-1}$ ).

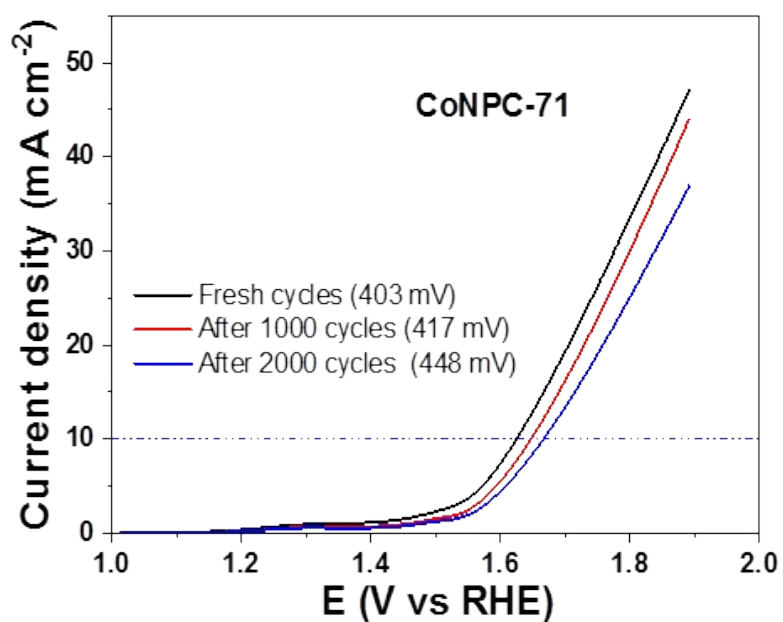

**Fig. S15** OER potential cycling tests of CoNPC-71 (Cycling test was performed in a range of 0.8-1.8 V vs RHE with  $50 \text{ mVs}^{-1}$ ).

**Table. S1** The physical and electrochemical properties of CoNPCs

| Catalyst | N1s Distribution (wt%) |      |     | Total N content (wt%) | Co2p <sub>3/2</sub> Distribution (wt%) |      |                   | Total Co content (wt%) | N/C ratio (wt%) |
|----------|------------------------|------|-----|-----------------------|----------------------------------------|------|-------------------|------------------------|-----------------|
|          | N1                     | N2   | N3  |                       | Co <sup>0</sup>                        | Co-O | Co-N <sub>x</sub> |                        |                 |
| CoNPC-71 | 1.5                    | 3.05 | 1.1 | 5.65                  | 0.20                                   | 0.45 | 0.25              | 0.9                    | 0.019           |
| CoNPC-81 | 1                      | 2.74 | 1.1 | 4.84                  | 0.25                                   | 0.27 | 0.3               | 0.82                   | 0.017           |
| CoNPC-91 | 0.3                    | 1.74 | 0.3 | 2.34                  | 0.24                                   | 0.39 | 0.22              | 0.85                   | 0.014           |



**Table. S2** The electrocatalytic activities towards the ORR in 0.1 M KOH electrolyte of CoNPCs catalysts with other reported electrocatalysts.

| Electrocatalyst                         | Onset potential (E/V) | Half-wave potential, $E_{1/2}$ (E/V vs. RHE) | Limiting current density ( $\text{mA cm}^{-2}$ ) | Ref.             |
|-----------------------------------------|-----------------------|----------------------------------------------|--------------------------------------------------|------------------|
| NPC-71                                  | 0.82                  | 0.52                                         | -4.07                                            | This work        |
| <b>CoNPC-71</b>                         | <b>0.93</b>           | <b>0.81</b>                                  | <b>-7.48</b>                                     | <b>This work</b> |
| CoNPC-81                                | 0.93                  | 0.79                                         | -8.30                                            | This work        |
| CoNPC-91                                | 0.87                  | 0.75                                         | -6.75                                            | This work        |
| FeNi-N-CNFs                             | 0.90                  | 0.79                                         | ~ -4.0                                           | [S1]             |
| HNCS71 (Fe-N-C)                         | 0.97                  | 0.82                                         | -6.50                                            | [S2]             |
| Co <sub>4</sub> N/CNW/CC                | ~0.90                 | 0.80                                         | -12.35                                           | [S3]             |
| NiCo@GC-600                             | 0.90                  | 0.81                                         | -4.75                                            | [S4]             |
| Fe-N/C-800                              | 0.923                 | 0.809                                        | -6.0                                             | [S5]             |
| Co@Co <sub>3</sub> O <sub>4</sub> @C-CM | 0.93                  | 0.81                                         | ~ -4.6                                           | [S6]             |
| NC/Fe (1.00%)                           | 0.85                  | ~0.75                                        | ~-5.25                                           | [S7]             |

**Table. S3** The alkaline membrane fuel cells (AEMFCs) performance data electrocatalyst with commercial membrane in H<sub>2</sub>-O<sub>2</sub> system, no added back pressurization, with other noble-metal free electrocatalysts.

| Cathode material     | Operating Temperature (°C) | Maximum power density (mW cm <sup>-2</sup> ) | Refer.           |
|----------------------|----------------------------|----------------------------------------------|------------------|
| <b>CoNPC-71</b>      | <b>60</b>                  | <b>68</b>                                    | <b>This work</b> |
| MnO <sub>x</sub> -GC | 70                         | 98                                           | [S8]             |
| FePc/MWCNT           | 50                         | 60                                           | [S9]             |
| NpGr-72              | 50                         | 27                                           | [S10]            |
| N-CNT                | 50                         | 37.3                                         | [S11]            |
| Au/C                 | 50                         | 36                                           | [S12]            |
| Ag/C                 | 50                         | 48                                           | [S13]            |

**Table. S4** A comparison of rechargeable Zn-air battery (ZAB) performance with other noble-metal free electrocatalysts.

| Catalyst                 | Current rate (mAcm <sup>-2</sup> ) | Charge overpotential (V) | Discharge overpotential (V) | Voltage polarization (V) | Lifetime (number of cycles) | Ref.             |
|--------------------------|------------------------------------|--------------------------|-----------------------------|--------------------------|-----------------------------|------------------|
| <b>CoNPC-91</b>          | <b>10</b>                          | <b>1.96</b>              | <b>1.15</b>                 | <b>0.81</b>              | <b>120</b>                  | <b>This work</b> |
| 40% Pt-Ru                | 10                                 | 2.20                     | 0.91                        | 1.29                     | 60                          | This work        |
| C-Fe-UFR                 | 10                                 | ~2.15                    | ~1.23                       | ~0.92                    | 100                         | [S14]            |
| Co <sub>4</sub> N/CNW/CC | 10                                 | 2.00                     | 1.16                        | 0.84                     | 405                         | [S3]             |
| FeNi/NPC                 | 25                                 | 1.94                     | 1.15                        | 0.79                     | 150                         | [S15]            |
| Fe/N/C@BMZIF             | 10                                 | 1.95                     | 1.13                        | 0.82                     | 100                         | [S16]            |

## References

- [S1] Z. Wang, M. Li, L. Fan, J. Han, Y. Xiong, *Appl. Surface Sci.*, 2017, 401, 89-99.
- [S2] J. Sanetuntikul, C. Chuaicham, Y.-W. Choi, S. Shanmugam, *J. Mater. Chem. A*, 2015, 3, 15473-15481.
- [S3] F. Meng, H. Zhong, D. Bao, J. Yan, X. Zhang, *J. Am. Chem. Soc.*, 2016, 138, 10226-10231.
- [S4] A. Sivanantham, S. Shanmugam, *ChemElectroChem*, 2018, 5, 1937-1943.
- [S5] L. Lin, Q. Zhu, A. Xu, *J. Am. Chem. Soc.*, 2014, 136, 11027-11033.
- [S6] W. Xia, R. Zou, L. An, D. Xia, S. Guo, *Energy Environ. Sci.*, 2015, 8, 568.
- [S7] J. Masa, A. Zhao, W. Xia, M. Muhler, W. Schuhmann, *Electrochimica Acta*, 2014, 128, 271-278.
- [S8] J.W. Ng, Y. Gorlin, D. Nordlund, T.F. Jaramillo, *J. Electrochem. Soc.*, 2014, 161, D3105-D3112.
- [S9] I. Kruusenberg, L. Matisen, Q. Shah, A.M. Kannan, K. Tammeveski, *Int. J. Hydrogen Energy*, 2012, 37, 4406-4412.
- [S10] T. Palaniselvam, M. O. Valappil, R. Illathvalappil, S. Kurungot *Energy Environ. Sci.*, 2014, 7, 1059-1067.
- [S11] C. V. Rao, Y. Ishikawa, *J. Phys. Chem. C*, 2012, 116, 4340-4346.
- [S12] S. D. Poynton, J. P. Kizewski, R.C.T. Slade, J.R. Varcoe, *Solid State Ionics*, 2010, 181, 219-222.
- [S13] J.R. Varcoe, R.C.T. Slade, G.L. Wright, Y. Chen, *J. Phys. Chem. B*, 2006, 110, 21041-21049.
- [S14] F. Meng, H. Zhong, J. Yan, X. Zhang, *Nano Research*, 2017, 10, 4436-4447.
- [S15] H. Zhong, J. Wang, Q. Zhang, F. Meng, D. Bao, T. Liu, X. Yang, Z. Chang, J. Yan, X. Zhang, *Adv. Sustainable Syst.*, 2017, 1, 1700020.
- [S16] M. Wang, T. Qian, J. Zhou, C. Yan, *ACS Appl. Mater. Interfaces*, 2017, 9, 5213-5221.
